# Supplementary material for: Metal Release Mechanism and Electrochemical Properties of Lix(Ni1/3Mn1/3Co1/3)O2
Source: MDPI journal article supplement (doi:10.3390/app12084065), 2022-04-18
Supplement: s1 [file s1]

Archive with 1 entries (1 files):
- applsci-1626565-SI.pdf
